# Supplementary material for: Prevalence of Hearing Loss and Hearing Aid Use Among Adults in France in the CONSTANCES Study
Source: PubMed Central journal article supplement (PMC9206187; doi:10.1001/jamanetworkopen.2022.17633), 2022-06-17
Supplement: jamanetwopen-e2217633-s001.pdf [file jamanetwopen-e2217633-s001.pdf]

## Supplementary Online Content

Lisan Q, Goldberg M, Lahlou G, et al. Prevalence of hearing loss and hearing aid use among adults in France in the CONSTANCES study. *JAMA Netw Open*.

2022;5(6):e2217633. doi:10.1001/jamanetworkopen.2022.17633

**eTable 1.** Comparison of Excluded Versus Included Participants

**eTable 2.** Prevalence of Hearing Loss, Overall, by Sex and by Age Group in the CONSTANCES Cohort

**eTable 3.** Unweighted and Weighted Prevalence Rates of Hearing Loss and Disabling Hearing Loss for 2013, 2014, 2015 and 2016 in CONSTANCES

**eTable 4.** Determinants of Hearing Loss Examined as a Continuous Variable (Multivariable Linear Regression Analysis)

**eTable 5.** Prevalence Estimates of Disabling Hearing Loss After Exclusion of Participants With Hearing Aids in CONSTANCES

**eTable 6.** Characteristics Associated With Hearing Loss Severity After Reclassifying Participants With Hearing Aids Into the Group With Any Hearing Loss Instead of Disabling Hearing Loss

**eTable 7.** Unweighted and Weighted Prevalence Rates of Disabling Hearing Loss for 2013, 2014, 2015 and 2016 in CONSTANCES After Exclusion of Participants With Hearing Aids

**eTable 8.** Characteristics Associated With Hearing Loss and Hearing Aid Use After Multiple Imputations

**eTable 9.** European Standardized Rates and Estimated Number of Individuals With Hearing Loss and Hearing Aids

**eFigure 1.** Evolution of Pure Tone Average According to Age: Regression Spline, Adjusted for Covariates

**eFigure 2.** Prevalence of Any Hearing Loss and Disabling Hearing Loss by Age and Sex After Reclassification of Participants With Hearing Aids Into the Group with Any Hearing Loss Instead of Disabling Hearing Loss

This supplementary material has been provided by the authors to give readers additional information about their work.

**eTable 1.** Comparison of Excluded Versus Included Participants

|                                 | <b>Excluded<br/>N=14 410</b> | <b>Included<br/>N=186 460</b> |
|---------------------------------|------------------------------|-------------------------------|
| Male sex                        | 6 818 (47.3)                 | 86 130 (46.2)                 |
| Age (years)                     | 46.2 ± 13.7                  | 47.1 ± 13.5                   |
| BMI (kg/m <sup>2</sup> )        | 24.4 ± 4.3                   | 25.0 ± 4.5                    |
| Noise exposure at work          | 2 748 (19.8)                 | 47 769 (26.5)                 |
| Glycemia (mmol/L)               | 5.24 ± 0.9                   | 5.33 ± 0.9                    |
| Total cholesterol (mmol/L)      | 5.23 ± 1.0                   | 5.40 ± 1.1                    |
| Systolic blood pressure (mmHg)  | 125.7 ± 16.1                 | 127.5 ± 16.4                  |
| Diastolic blood pressure (mmHg) | 75.6 ± 9.9                   | 76.1 ± 9.9                    |
| Diabetes                        | 512 (3.6)                    | 7 153 (3.8)                   |
| Hypertension                    | 2 670 (18.8)                 | 43 595 (23.4)                 |
| Prevalent CVD                   | 281 (2.0)                    | 4 086 (2.3)                   |
| Depression                      | 4 505 (31.4)                 | 54 874 (29.5)                 |
| Living alone                    | 4 838 (34.5)                 | 48 155 (26.4)                 |
| Smoking                         |                              |                               |
| Never                           | 6 464 (47.6)                 | 85 176 (47.8)                 |
| Former smoker                   | 4 334 (31.9)                 | 60 601 (34.0)                 |
| Current smoker                  | 2 768 (20.4)                 | 32 563 (18.3)                 |
| Currently working               | 10 031 (72.7)                | 127 624 (70.7)                |
| Diploma (ISCED 2011)            |                              |                               |
| Primary education               | 415 (2.9)                    | 5 154 (2.7)                   |
| Lower secondary education       | 642 (4.5)                    | 10 415 (5.6)                  |
| Upper secondary                 | 3 229 (22.6)                 | 60 673 (32.7)                 |
| Bachelor or equivalent          | 4 592 (32.2)                 | 63 402 (34.1)                 |
| Master and doctoral degree      | 5 135 (36.0)                 | 42 800 (23.0)                 |
| Household income (€/month)      |                              |                               |
| <1000                           | 695 (5.2)                    | 7 213 (4.2)                   |
| 1000-1500                       | 940 (7.1)                    | 12 182 (7.1)                  |
| 1500-2100                       | 1 514 (11.5)                 | 20 004 (11.7)                 |
| >2100                           | 10 016 (76.1)                | 132 103 (77.0)                |
| Type of commune                 |                              |                               |
| Rural                           | 1 093 (7.59)                 | 36 669 (19.7)                 |
| Urban                           | 13 317 (92.4)                | 149 779 (80.3)                |

*Abbreviations:* BMI: body mass index; CVD: cardiovascular disease; ISCED: international standard classification of education.  
*Note:* values are means ± SD or n (%).

**eTable 2.** Prevalence of Hearing Loss, Overall, by Sex and by Age Group in the CONSTANCES Cohort

|                            | <b>Hearing loss<br/>(PTA ≥20 dB)<br/>% (95% CI)</b> | <b>Disabling hearing loss<br/>(PTA ≥35 dB)<br/>% (95% CI)</b> |
|----------------------------|-----------------------------------------------------|---------------------------------------------------------------|
| <b>Overall prevalence</b>  | 24.8 (24.6 – 25.0)                                  | 4.3 (4.2 – 4.4)                                               |
| <b>Both sexes combined</b> |                                                     |                                                               |
| 18-25 years                | 4.0 (3.6 – 4.4)                                     | 0.3 (0.2 – 0.4)                                               |
| 26-30 years                | 4.4 (4.1 – 4.8)                                     | 0.4 (0.3 – 0.5)                                               |
| 31-35 years                | 5.5 (5.2 – 5.9)                                     | 0.3 (0.3 – 0.4)                                               |
| 36-40 years                | 7.8 (7.5 – 8.2)                                     | 0.7 (0.6 – 0.8)                                               |
| 41-45 years                | 11.4 (11.0 – 11.8)                                  | 0.9 (0.8 – 1.1)                                               |
| 46-50 years                | 17.6 (17.1 – 18.1)                                  | 1.8 (1.6 – 2.0)                                               |
| 51-55 years                | 27.4 (26.8 – 28.0)                                  | 3.1 (2.8 – 3.3)                                               |
| 56-60 years                | 38.5 (37.8 – 39.1)                                  | 5.9 (5.5 – 6.2)                                               |
| 61-65 years                | 51.4 (50.7 – 52.0)                                  | 10.1 (9.7 – 10.5)                                             |
| 66-70 years                | 63.3 (62.6 – 64.0)                                  | 16.4 (15.9 – 16.9)                                            |
| 71-75 years                | 68.9 (66.0 – 71.8)                                  | 23.3 (20.7 – 26.0)                                            |
|                            |                                                     |                                                               |
| <b>Females</b>             |                                                     |                                                               |
| 18-25 years                | 4.4 (3.9 – 5.0)                                     | 0.3 (0.2 – 0.5)                                               |
| 26-30 years                | 5.1 (4.6 – 5.6)                                     | 0.3 (0.2 – 0.5)                                               |
| 31-35 years                | 6.3 (5.8 – 6.8)                                     | 0.3 (0.2 – 0.4)                                               |
| 36-40 years                | 8.5 (8.0 – 9.0)                                     | 0.8 (0.6 – 0.9)                                               |
| 41-45 years                | 11.9 (11.4 – 12.5)                                  | 1.0 (0.8 – 1.1)                                               |
| 46-50 years                | 17.0 (16.3 – 17.7)                                  | 1.7 (1.5 – 2.0)                                               |
| 51-55 years                | 25.2 (24.4 – 26.1)                                  | 2.5 (2.2 – 2.8)                                               |
| 56-60 years                | 34.6 (33.7 – 35.5)                                  | 4.9 (4.5 – 5.3)                                               |
| 61-65 years                | 46.8 (45.9 – 47.8)                                  | 7.7 (7.2 – 8.2)                                               |
| 66-70 years                | 58.6 (57.6 – 60.0)                                  | 13.3 (12.6 – 14.0)                                            |
| 71-75 years                | 64.1 (59.7 – 68.4)                                  | 17.6 (14.2 – 21.1)                                            |
|                            |                                                     |                                                               |
| <b>Males</b>               |                                                     |                                                               |
| 18-25 years                | 3.4 (2.8 – 3.9)                                     | 0.4 (0.2 – 0.6)                                               |
| 26-30 years                | 3.6 (3.1 – 4.0)                                     | 0.4 (0.3 – 0.6)                                               |
| 31-35 years                | 4.7 (4.2 – 5.1)                                     | 0.4 (0.2 – 0.5)                                               |
| 36-40 years                | 7.0 (6.5 – 7.5)                                     | 0.6 (0.5 – 0.8)                                               |
| 41-45 years                | 10.8 (10.2 – 11.4)                                  | 0.9 (0.7 – 1.0)                                               |
| 46-50 years                | 18.3 (17.5 – 19.1)                                  | 1.9 (1.6 – 2.1)                                               |
| 51-55 years                | 29.9 (29.0 – 30.9)                                  | 3.8 (3.4 – 4.2)                                               |
| 56-60 years                | 42.8 (41.8 – 43.8)                                  | 6.9 (6.4 – 7.4)                                               |
| 61-65 years                | 56.1 (55.2 – 57.1)                                  | 12.6 (12.0 – 13.3)                                            |
| 66-70 years                | 68.1 (67.2 – 69.1)                                  | 19.7 (18.9 – 20.5)                                            |
| 71-75 years                | 73.3 (69.5 – 77.2)                                  | 28.7 (24.7 – 32.6)                                            |

Abbreviations: PTA: pure tone average, in the better ear; CI: confidence interval; dB: decibel.

**eTable 3.** Unweighted and Weighted Prevalence Rates of Hearing Loss and Disabling Hearing Loss for 2013, 2014, 2015 and 2016 in CONSTANCES

|                       | <b>Any hearing loss<br/>(PTA <math>\geq</math>20 dB)<br/>% (95% CI)</b> | <b>Disabling hearing loss<br/>(PTA <math>\geq</math>35 dB)<br/>% (95% CI)</b> |
|-----------------------|-------------------------------------------------------------------------|-------------------------------------------------------------------------------|
| <b>Year</b>           |                                                                         |                                                                               |
| <b>2013, n=12 224</b> |                                                                         |                                                                               |
| Unweighted            | 25.2 (24.4 – 26.0)                                                      | 4.5 (4.2 – 4.9)                                                               |
| Weighted              | 21.5 (20.4 – 23.0)                                                      | 4.1 (3.6 – 5.0)                                                               |
| <b>2014, n=17 713</b> |                                                                         |                                                                               |
| Unweighted            | 26.6 (26.0 – 27.2)                                                      | 4.4 (4.1 – 4.7)                                                               |
| Weighted              | 22.6 (21.7 – 23.0)                                                      | 3.8 (3.4 – 4.0)                                                               |
| <b>2015, n=23 102</b> |                                                                         |                                                                               |
| Unweighted            | 24.6 (24.1 – 25.2)                                                      | 4.4 (4.1 – 4.6)                                                               |
| Weighted              | 24.3 (23.4 – 25.0)                                                      | 4.9 (4.4 – 5.0)                                                               |
| <b>2016, n=22 062</b> |                                                                         |                                                                               |
| Unweighted            | 25.3 (24.7 – 25.8)                                                      | 4.4 (4.2 – 4.7)                                                               |
| Weighted              | 25.9 (25.0 – 27.0)                                                      | 5.7 (5.2 – 6.0)                                                               |

Abbreviations: PTA: pure tone average; dB: decibel; CI: confidence interval.

**eTable 4.** Determinants of Hearing Loss Examined as a Continuous Variable (Multivariable Linear Regression Analysis)

|                                        | Adjusted regression coefficient | 95% CI        |
|----------------------------------------|---------------------------------|---------------|
| Male sex                               | -0.04                           | -0.12 – 0.04  |
| BMI (per 1 kg/m <sup>2</sup> increase) | 0.10                            | 0.09 – 0.11   |
| Noise exposure at work                 | 0.68                            | 0.60 – 0.77   |
| Diabetes                               | 0.98                            | 0.77 – 1.19   |
| Hypertension                           | -0.03                           | -0.13 – 0.07  |
| Prevalent CVD                          | 1.04                            | 0.77 – 1.30   |
| Depression                             | 0.21                            | 0.13 – 0.29   |
| Living alone                           | -0.47                           | -0.57 – -0.37 |
| Smoking                                |                                 |               |
| Never                                  | 0                               | Reference     |
| Former smoker                          | 0.23                            | 0.14 – 0.31   |
| Current smoker                         | 0.63                            | 0.53 – 0.74   |
| Diploma: ISCED 2011                    |                                 |               |
| Level 0-1                              | 0                               | Reference     |
| Level 2                                | -1.19                           | -1.49 – -0.90 |
| Level 3-4                              | -1.59                           | -1.85 – -1.34 |
| Level 5-6                              | -2.65                           | -2.91 – -2.39 |
| Level 7-8                              | -3.37                           | -3.63 – -3.10 |
| Currently working                      | -0.15                           | -0.27 – -0.03 |
| Type of commune                        |                                 |               |
| Rural                                  | 0                               | Reference     |
| Urban                                  | -0.71                           | -0.81 – -0.61 |
| Household income (€/month)             |                                 |               |
| <1000                                  | 0                               | Reference     |
| 1000-1500                              | -0.23                           | -0.48 – 0.02  |
| 1500-2100                              | -0.58                           | -0.81 – -0.34 |
| >2100                                  | -1.32                           | -1.54 – -1.09 |

Note: Results for age are given in the eFigure 1. Values are expressed as loss in dB, i.e.,  $\beta=0.68$  for noise exposure at work means that noise exposure is associated with a 0.68 dB loss, whereas  $\beta=-1.19$  for ISCED level 2 indicates a mean difference of 1.19 dB in favor of ISCED level 2 compared to ISCED level 0-1 (reference). Regression coefficients are adjusted for the covariates listed in the table and age. Smoothing spline was used for age.

Abbreviations: CI: confidence interval, BMI: body mass index; CVD: cardiovascular disease; ISCED: international standard classification of education.

**eTable 5.** Prevalence Estimates of Disabling Hearing Loss After Exclusion of Participants With Hearing Aids in CONSTANCES

|                          | <b>Disabling hearing loss (PTA in the better ear <math>\geq</math>35 dB)</b> |
|--------------------------|------------------------------------------------------------------------------|
|                          | % (95% CI)                                                                   |
| <b>Overall</b>           | 2.8 (2.7 – 2.9)                                                              |
| <b>Overall – males</b>   | 3.6 (3.5 – 3.8)                                                              |
| <b>Overall - females</b> | 2.0 (2.0 – 2.1)                                                              |
|                          |                                                                              |
| <b>By age range</b>      |                                                                              |
| 18-25 years              | 0.1 (0.1 – 0.2)                                                              |
| 26-30 years              | 0.2 (0.1 – 0.2)                                                              |
| 31-35 years              | 0.2 (0.1 – 0.2)                                                              |
| 36-40 years              | 0.3 (0.2 – 0.4)                                                              |
| 41-45 years              | 0.5 (0.4 – 0.6)                                                              |
| 46-50 years              | 1.0 (0.9 – 1.1)                                                              |
| 51-55 years              | 1.9 (1.7 – 2.1)                                                              |
| 56-60 years              | 3.9 (3.6 – 4.1)                                                              |
| 61-65 years              | 6.9 (6.5 – 7.2)                                                              |
| 66-70 years              | 11.2 (10.7 – 11.6)                                                           |
| 71-75 years              | 17.0 (14.5 – 19.4)                                                           |

Abbreviations: PTA: pure tone average, in the better ear; CI: confidence interval; dB: decibel.

**eTable 6.** Characteristics Associated With Hearing Loss Severity After Reclassifying Participants With Hearing Aids Into the Group With Any Hearing Loss Instead of Disabling Hearing Loss

|                                 | Study characteristics                   |                                                      |                                                          |                                                |
|---------------------------------|-----------------------------------------|------------------------------------------------------|----------------------------------------------------------|------------------------------------------------|
|                                 | Descriptive analysis                    |                                                      |                                                          | Multivariable logistic regression OR (95% CI)* |
|                                 | No hearing loss<br>N=140 243<br>(75.2%) | Any hearing loss<br>(PTA ≥20 dB)<br>N=46 217 (24.8%) | Disabling hearing loss<br>(PTA ≥35 dB)<br>N=5 085 (2.7%) |                                                |
| Male sex                        | 62 792 (44.8)                           | 23 338 (50.5)                                        | 3 069 (60.4)                                             | 1.51 (1.40 – 1.63)                             |
| Age (years)                     | 43.7 ± 12.6                             | 57.5 ± 10.4                                          | 61.7 ± 8.0                                               | 1.12 (1.12 – 1.13)                             |
| BMI (kg/m <sup>2</sup> )        | 24.6 ± 4.4                              | 26.2 ± 4.7                                           | 27.0 ± 4.8                                               | 1.03 (1.02 – 1.03)                             |
| Audiometric data                |                                         |                                                      |                                                          |                                                |
| PTA left ear (dB)               | 12.0 ± 6.6                              | 28.9 ± 8.7                                           | 43.3 ± 8.3                                               | -                                              |
| PTA right ear (dB)              | 12.8 ± 6.6                              | 29.0 ± 8.4                                           | 42.8 ± 7.7                                               | -                                              |
| PTA better ear (dB)             | 10.4 ± 5.3                              | 26.4 ± 6.5                                           | 40.2 ± 5.7                                               | -                                              |
| Noise exposure at work          | 34 410 (25.4)                           | 13 359 (29.9)                                        | 1 795 (36.6)                                             | 1.46 (1.35 – 1.57)                             |
| Glycemia (mmol/L)               | 5.3 ± 0.8                               | 5.6 ± 1.1                                            | 5.8 ± 1.2                                                | -                                              |
| Total cholesterol (mmol/L)      | 5.3 ± 1.1                               | 5.7 ± 1.1                                            | 5.7 ± 1.1                                                | -                                              |
| Systolic blood pressure (mmHg)  | 125.5 ± 15.4                            | 133.6 ± 17.6                                         | 137.6 ± 17.9                                             | -                                              |
| Diastolic blood pressure (mmHg) | 75.3 ± 9.7                              | 78.5 ± 10.0                                          | 79.6 ± 10.1                                              | -                                              |
| Diabetes                        | 3 625 (2.6)                             | 3 528 (7.6)                                          | 571 (11.3)                                               | 1.14 (1.02 – 1.28)                             |
| Hypertension                    | 26 062(18.6)                            | 17 533 (38.0)                                        | 2 444 (48.1)                                             | 1.03 (0.96 – 1.11)                             |
| Prevalent CVD                   | 1925 (1.4)                              | 2161 (4.8)                                           | 289 (7.9)                                                | 1.25 (1.10 – 1.43)                             |
| Depression                      | 40 479 (28.9)                           | 14 395 (31.2)                                        | 1 576 (31.1)                                             | 1.10 (1.02 – 1.19)                             |
| Living alone                    | 37 264 (27.1)                           | 10 891 (24.2)                                        | 1 219 (24.6)                                             | 0.91 (0.83 – 1.00)                             |
| Smoking                         |                                         |                                                      |                                                          |                                                |
| Never                           | 65 951 (49.1)                           | 19 225 (43.8)                                        | 1 985 (41.4)                                             | 1.00 (ref)                                     |
| Former smoker                   | 42 463 (31.6)                           | 18 138 (41.3)                                        | 2 135 (44.5)                                             | 1.06 (0.98 – 1.14)                             |
| Current smoker                  | 26 013 (19.4)                           | 6 550 (14.9)                                         | 673 (14.0)                                               | 1.26 (1.13 – 1.40)                             |
| Currently working               | 106 474 (78.1)                          | 21 150 (47.9)                                        | 1 525 (31.9)                                             | 0.88 (0.80 – 0.96)                             |
| Diploma (ISCED 2011)            |                                         |                                                      |                                                          |                                                |
| Primary education               | 2 944 (2.1)                             | 2 210 (4.9)                                          | 369 (7.5)                                                | 1.00 (ref)                                     |
| Lower secondary education       | 5 636 (4.1)                             | 4 779 (10.6)                                         | 730 (14.8)                                               | 0.73 (0.61 – 0.86)                             |
| Upper secondary                 | 41 289 (30.0)                           | 19 384 (43.1)                                        | 2 392 (48.4)                                             | 0.67 (0.58 – 0.78)                             |
| Bachelor or equivalent          | 51 049 (37.1)                           | 12 353 (27.5)                                        | 963 (19.5)                                               | 0.43 (0.37 – 0.51)                             |
| Master's and doctoral degree    | 36 577 (26.6)                           | 6 223 (13.8)                                         | 485 (9.8)                                                | 0.39 (0.32 – 0.46)                             |

**eTable 6 (continued).** Characteristics Associated With Hearing Loss Severity After Reclassifying Participants With Hearing Aids Into the Group With Any Hearing Loss Instead of Disabling Hearing Loss

|                            | Study characteristics                   |                                                      |                                                          | Multivariable logistic regression OR (95% CI)* |
|----------------------------|-----------------------------------------|------------------------------------------------------|----------------------------------------------------------|------------------------------------------------|
|                            | Descriptive analysis                    |                                                      |                                                          |                                                |
|                            | No hearing loss<br>N=140 243<br>(75.2%) | Any hearing loss<br>(PTA ≥20 dB)<br>N=46 217 (24.8%) | Disabling hearing loss<br>(PTA ≥35 dB)<br>N=5 085 (2.7%) |                                                |
| Household income (€/month) |                                         |                                                      |                                                          |                                                |
| <1000                      | 5 450 (4.2)                             | 1 763 (4.2)                                          | 255 (5.6)                                                | 1.00 (ref)                                     |
| 1000-1500                  | 8 807 (6.8)                             | 3 375 (8.0)                                          | 484 (10.7)                                               | 0.94 (0.78 – 1.14)                             |
| 1500-2100                  | 14 541 (11.2)                           | 5 463 (13.0)                                         | 698 (15.4)                                               | 0.74 (0.61 – 0.89)                             |
| >2100                      | 100 681 (77.8)                          | 31 422 (74.8)                                        | 3 106 (68.4)                                             | 0.60 (0.50 – 0.72)                             |
| Type of commune            |                                         |                                                      |                                                          |                                                |
| Rural                      | 26 402 (18.8)                           | 10 267 (22.2)                                        | 1 172 (23.0)                                             | 1.00 (ref)                                     |
| Urban                      | 113 835 (81.2)                          | 35 944 (77.8)                                        | 3 913 (77.0)                                             | 0.96 (0.88 – 1.04)                             |

Notes: values are mean ± SD or n (%).

Abbreviations: PTA: pure tone average; dB: decibel; CI: confidence interval; ref: reference category; BMI: body mass index; CVD: cardiovascular disease; ISCED: international standard classification of education.

\* Odds ratios measure the likelihood of having PTA ≥35 dB vs. PTA <35 dB (N= 148,101; 38,359 participants with missing data)



**eTable 7.** Unweighted and Weighted Prevalence Rates of Disabling Hearing Loss for 2013, 2014, 2015 and 2016 in CONSTANCES After Exclusion of Participants With Hearing Aids

|                       | <b>Disabling hearing loss (PTA <math>\geq</math>35 dB)<br/>% (95% CI)</b> |
|-----------------------|---------------------------------------------------------------------------|
| <b>Year</b>           |                                                                           |
| <b>2013, n=12 224</b> |                                                                           |
| Unweighted            | 3.3 (2.9 – 3.6)                                                           |
| Weighted              | 3.2 (2.7 – 4.0)                                                           |
| <b>2014, n=17 713</b> |                                                                           |
| Unweighted            | 2.9 (2.7 – 3.2)                                                           |
| Weighted              | 2.7 (2.3 – 3.0)                                                           |
| <b>2015, n=23 102</b> |                                                                           |
| Unweighted            | 2.8 (2.6 – 3.0)                                                           |
| Weighted              | 3.3 (2.9 – 4.0)                                                           |
| <b>2016, n=22 062</b> |                                                                           |
| Unweighted            | 2.8 (2.6 – 3.1)                                                           |
| Weighted              | 3.6 (3.2 – 4.0)                                                           |

Abbreviations: HL: hearing loss; CI: confidence interval.

**eTable 8.** Characteristics Associated With Hearing Loss and Hearing Aid Use After Multiple Imputations

|                                        | Odds ratio (95% CI) for:       |                                       |                                                                             |                                               |
|----------------------------------------|--------------------------------|---------------------------------------|-----------------------------------------------------------------------------|-----------------------------------------------|
|                                        | Any hearing loss (PTA ≥20 dB)* | Disabling hearing loss (PTA ≥ 35 dB)† | Disabling hearing loss (PTA ≥ 35 dB) after exclusion of hearing aids users† | Hearing aids use among disabling hearing loss |
| Male sex                               | 1.15 (1.12 – 1.18)             | 1.39 (1.32 – 1.46)                    | 1.55 (1.45 – 1.65)                                                          | 0.76 (0.68 – 0.84)                            |
| Age (per 1 year increase)              | 1.09 (1.09 – 1.10)             | 1.11 (1.11 – 1.11)                    | 1.12 (1.11 – 1.12)                                                          | 0.98 (0.97 – 0.99)                            |
| BMI (per 1 kg/m <sup>2</sup> increase) | 1.02 (1.02 – 1.03)             | 1.02 (1.01 – 1.03)                    | 1.03 (1.02 – 1.03)                                                          | 0.98 (0.97 – 0.99)                            |
| Noise exposure at work                 | 1.24 (1.21 – 1.28)             | 1.50 (1.43 – 1.58)                    | 1.48 (1.40 – 1.58)                                                          | 1.09 (0.98 – 1.21)                            |
| Living alone                           | 0.95 (0.92 – 0.98)             | 0.95 (0.89 – 1.02)                    | 0.93 (0.85 – 1.00)                                                          | 1.05 (0.92 – 1.21)                            |
| Diabetes                               | 1.18 (1.12 – 1.25)             | 1.18 (1.08 – 1.28)                    | 1.16 (1.05 – 1.28)                                                          | 1.10 (0.93 – 1.29)                            |
| Hypertension                           | 1.00 (0.97 – 1.03)             | 1.05 (1.00 – 1.11)                    | 1.05 (0.99 – 1.12)                                                          | 0.99 (0.90 – 1.10)                            |
| Prevalent CVD                          | 1.18 (1.10 – 1.27)             | 1.21 (1.10 – 1.33)                    | 1.28 (1.15 – 1.44)                                                          | 0.86 (0.71 – 1.05)                            |
| Depression                             | 1.07 (1.04 – 1.10)             | 1.14 (1.08 – 1.20)                    | 1.09 (1.02 – 1.17)                                                          | 1.11 (1.00 – 1.24)                            |
| Smoking                                |                                |                                       |                                                                             |                                               |
| Never                                  | 1.00 (ref)                     | 1.00 (ref)                            | 1.00 (ref)                                                                  | 1.00 (ref)                                    |
| Former smoker                          | 1.04 (1.01 – 1.07)             | 1.02 (0.97 – 1.07)                    | 1.01 (0.95 – 1.08)                                                          | 1.00 (0.90 – 1.11)                            |
| Current smoker                         | 1.19 (1.14 – 1.23)             | 1.06 (0.98 – 1.15)                    | 1.21 (1.11 – 1.33)                                                          | 0.67 (0.57 – 0.79)                            |
| Diploma (ISCED 2011)                   |                                |                                       |                                                                             |                                               |
| Primary education                      | 1.00 (ref)                     | 1.00 (ref)                            | 1.00 (ref)                                                                  | 1.00 (ref)                                    |
| Lower secondary education              | 0.76 (0.71 – 0.82)             | 0.75 (0.66 – 0.84)                    | 0.72 (0.63 – 0.83)                                                          | 1.21 (0.94 – 1.56)                            |
| Upper secondary                        | 0.73 (0.69 – 0.78)             | 0.71 (0.64 – 0.79)                    | 0.67 (0.58 – 0.75)                                                          | 1.39 (1.11 – 1.76)                            |
| Bachelor or equivalent                 | 0.55 (0.52 – 0.59)             | 0.54 (0.48 – 0.60)                    | 0.44 (0.38 – 0.50)                                                          | 1.98 (1.56 – 2.52)                            |
| Master and doctoral degree             | 0.47 (0.44 – 0.50)             | 0.50 (0.45 – 0.57)                    | 0.39 (0.34 – 0.45)                                                          | 2.26 (1.75 – 2.93)                            |
| Currently working                      | 0.84 (0.81 – 0.86)             | 0.80 (0.75 – 0.86)                    | 0.82 (0.76 – 0.90)                                                          | 0.91 (0.80 – 1.02)                            |
| Type of commune                        |                                |                                       |                                                                             |                                               |
| Rural                                  | 1.00 (ref)                     | 1.00 (ref)                            | 1.00 (ref)                                                                  | 1.00 (ref)                                    |
| Urban                                  | 0.91 (0.88 – 0.94)             | 0.97 (0.91 – 1.02)                    | 0.96 (0.88 – 1.03)                                                          | 1.03 (0.92 – 1.15)                            |
| Household income (€/month)             |                                |                                       |                                                                             |                                               |
| <1000                                  | 1.00 (ref)                     | 1.00 (ref)                            | 1.00 (ref)                                                                  | 1.00 (ref)                                    |
| 1000-1500                              | 0.92 (0.85 – 0.94)             | 0.94 (0.81 – 1.10)                    | 0.87 (0.74 – 1.02)                                                          | 1.33 (0.98 – 1.80)                            |
| 1500-2100                              | 0.82 (0.76 – 0.88)             | 0.82 (0.71 – 0.95)                    | 0.74 (0.63 – 0.86)                                                          | 1.55 (1.16 – 2.07)                            |
| >2100                                  | 0.73 (0.68 – 0.78)             | 0.74 (0.64 – 0.85)                    | 0.60 (0.51 – 0.71)                                                          | 2.04 (1.53 – 2.71)                            |

\* Odds ratios measure the likelihood of having PTA ≥20 dB vs. PTA <20 dB. † Odds ratios measure the likelihood of having PTA ≥35 dB vs. PTA <35 dB

Abbreviations: PTA: pure tone average; dB: decibel; CI: confidence interval; ref: reference category; BMI: body mass index; CVD: cardiovascular disease; ISCED: international standard classification of education.

Notes: Odds ratios were obtained using logistic regression modeling and adjusted for the covariates listed in the table.

**eTable 9.** European Standardized Rates and Estimated Number of Individuals With Hearing Loss and Hearing Aids

|                                     | Any hearing loss<br>(PTA in the better ear $\geq 20$ dB) |                               | Disabling hearing loss<br>(PTA in the better ear $\geq 35$ dB) |                               |                                  |
|-------------------------------------|----------------------------------------------------------|-------------------------------|----------------------------------------------------------------|-------------------------------|----------------------------------|
|                                     | % (95% CI)                                               | Cases in millions<br>(95% CI) | % (95% CI)                                                     | Cases in millions<br>(95% CI) | % using hearing<br>aids (95% CI) |
| <b>Overall prevalence</b>           | 26.0 (25.7 – 26.4)                                       | 135.9 (133.2 – 138.6)         | 5.1 (4.9 – 5.4)                                                | 26.7 (24.2 – 29.2)            | 35.9 (33.3 – 38.6)               |
| <b>Overall prevalence – males</b>   | 26.4 (25.6 – 27.3)                                       | 67.6 (65.5 – 69.7)            | 5.8 (5.2 – 6.5)                                                | 14.9 (13.2 – 16.6)            | 31.6 (30.2 – 33.1)               |
| <b>Overall prevalence – females</b> | 25.4 (25.2 – 25.6)                                       | 68.3 (67.7 – 69.0)            | 4.4 (4.1 – 4.7)                                                | 11.8 (11.0 – 12.6)            | 42.4 (38.1 – 46.7)               |
| <b>Prevalence by age group</b>      |                                                          |                               |                                                                |                               |                                  |
| 18-25 years                         | 3.9 (3.6 – 4.1)                                          | 1.5 (1.4 – 1.6)               | 0.3 (0.2 – 0.5)                                                | 0.1 (0.1 – 0.2)               | 54.5 (54.4 – 54.6)               |
| 26-30 years                         | 4.3 (4.0 – 4.6)                                          | 2.0 (1.8 – 2.1)               | 0.4 (0.2 – 0.5)                                                | 0.2 (0.1 – 0.2)               | 51.6 (51.4 – 51.7)               |
| 31-35 years                         | 5.4 (5.0 – 5.9)                                          | 2.9 (2.6 – 3.1)               | 0.3 (0.2 – 0.5)                                                | 0.2 (0.1 – 0.2)               | 56.4 (56.3 – 56.5)               |
| 36-40 years                         | 7.8 (7.3 – 8.3)                                          | 4.1 (3.8 – 4.4)               | 0.7 (0.5 – 0.9)                                                | 0.4 (0.3 – 0.5)               | 53.2 (47.9 – 58.5)               |
| 41-45 years                         | 11.4 (10.3 – 12.5)                                       | 5.9 (5.4 – 6.5)               | 0.9 (0.8 – 1.1)                                                | 0.5 (0.4 – 0.6)               | 45.8 (45.6 – 46.1)               |
| 46-50 years                         | 17.6 (16.3 – 19.0)                                       | 9.2 (8.5 – 9.9)               | 1.8 (1.5 – 2.1)                                                | 0.9 (0.8 – 1.1)               | 43.7 (42.9 – 44.5)               |
| 51-55 years                         | 27.5 (27.0 – 28.1)                                       | 14.2 (13.9 – 14.4)            | 3.1 (2.8 – 3.5)                                                | 1.6 (1.4 – 1.8)               | 38.0 (37.0 – 39.0)               |
| 56-60 years                         | 38.5 (37.4 – 39.6)                                       | 20.3 (19.7 – 20.9)            | 5.9 (5.4 – 6.3)                                                | 3.1 (2.9 – 3.3)               | 35.6 (31.4 – 39.7)               |
| 61-65 years                         | 51.1 (50.7 – 51.6)                                       | 25.0 (24.8 – 25.2)            | 10.0 (9.5 – 10.6)                                              | 4.9 (4.6 – 5.2)               | 34.5 (31.1 – 37.9)               |
| 66-70 years                         | 62.9 (62.6 – 63.1)                                       | 27.0 (26.9 – 27.2)            | 16.1 (15.4 – 16.9)                                             | 6.9 (6.6 – 7.3)               | 36.3 (34.0 – 38.5)               |
| 71-75 years                         | 68.1 (67.7 – 68.6)                                       | 23.9 (23.7 – 24.0)            | 22.5 (18.8 – 26.1)                                             | 7.9 (6.6 – 9.2)               | 34.4 (32.9 – 35.9)               |

Note: Rates are standardized to the European population census 2019; overall prevalence rates are age-standardized, and rates by age groups are sex-standardized.

Abbreviations: PTA: pure tone average; dB: decibel; CI: confidence interval.

**eFigure 1.** Evolution of Pure Tone Average According to Age: Regression Spline, Adjusted for Covariates

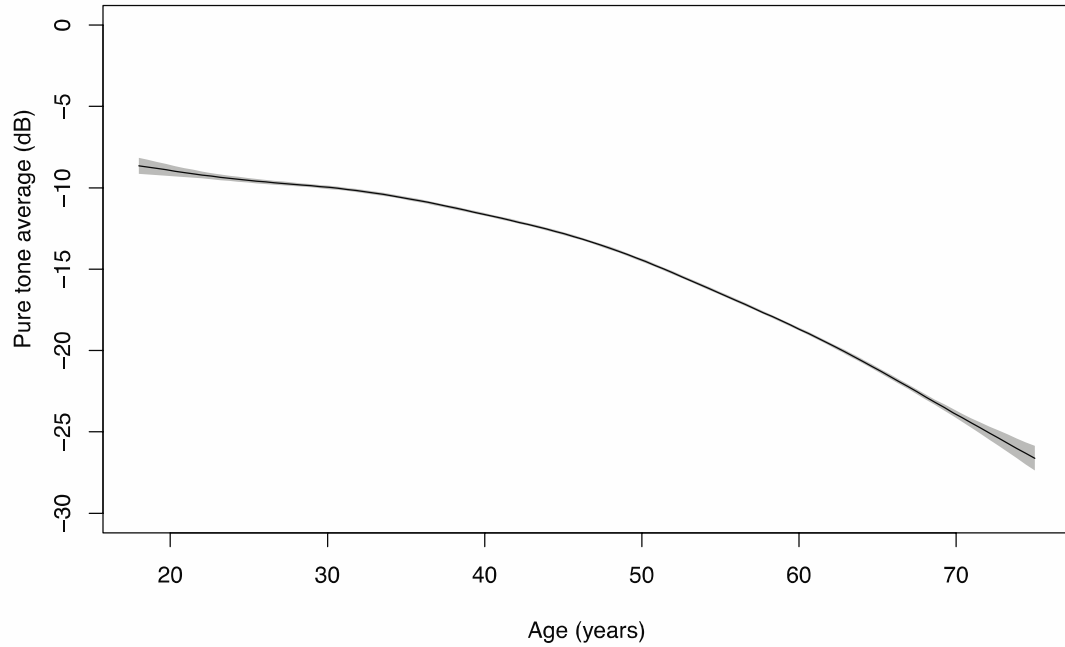

*Note:* Shaded area represents confidence interval. The multivariate regression model was adjusted for BMI, noise exposure at work, diabetes, hypertension, prevalent CVD, living alone, household income, depression, smoking status, level of diploma, currently working and type of commune.  
*Abbreviations:* dB: decibel.

**eFigure 2.** Prevalence of Any Hearing Loss and Disabling Hearing Loss by Age and Sex After Reclassification of Participants With Hearing Aids Into the Group with Any Hearing Loss Instead of Disabling Hearing Loss

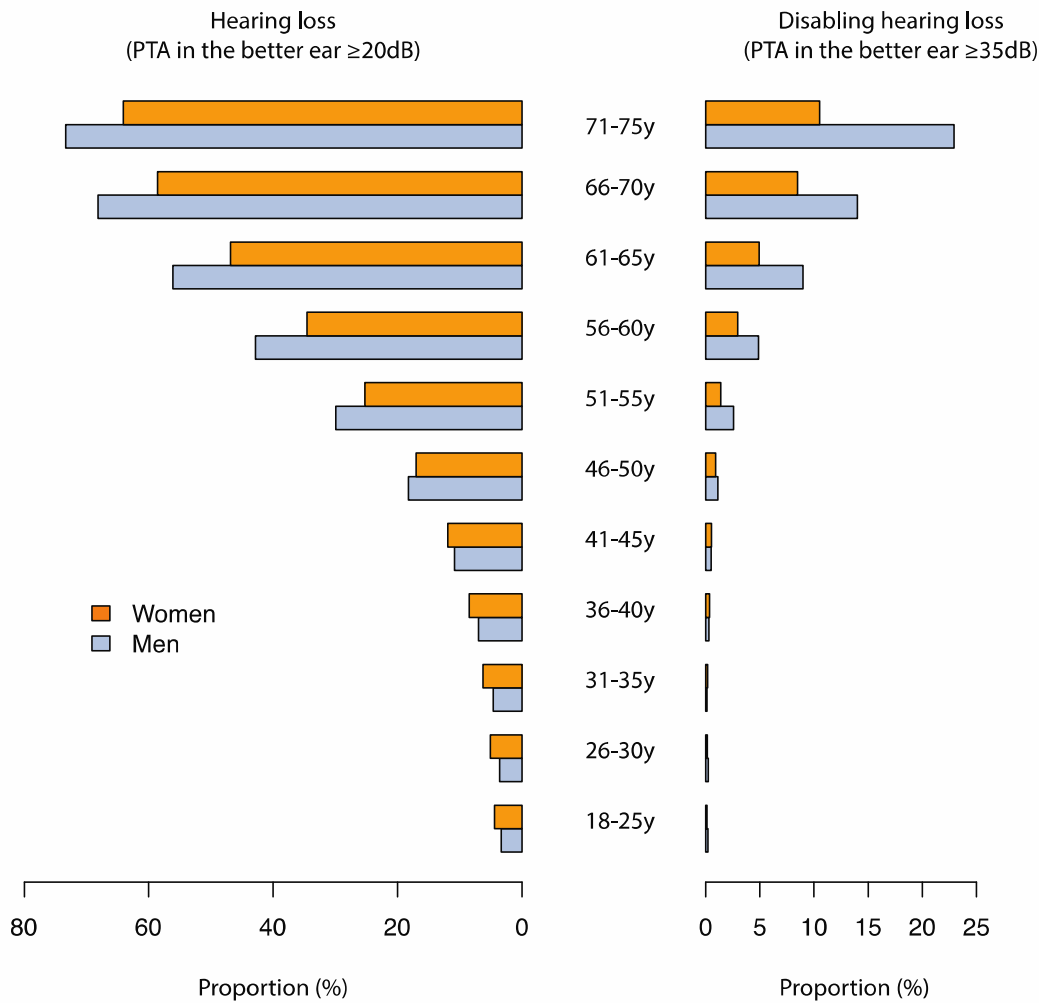

Abbreviations: PTA: pure tone average; dB: decibel.
